# Supplementary material for: Production, Purification and Characterization of Mannanase Obtained from Pichia Kudriavzevii Strain AUMC 10190 Isolated from Citrus Wastes
Source: Research Square preprint supplement (doi:10.21203/rs.3.rs-98363/v1), 2020-11-02
Supplement: Supplementary file 1 [file 444b6a708bc0ce046f6f13e1.docx]

**Production, purification and characterization of mannanase obtained from Pichia kudriavzevii strain AUMC 10190 isolated from citrus wastes**

Folake T. Afolabi *1 and Yetunde Z. Jimoh2

Department of Microbiology, Faculty of Science, University of Ibadan, Ibadan, Nigeria

Correspondence:

E-mail: [folakeojo1@yahoo.com](mailto:folakeojo1@yahoo.com)

Tel: +23408034218552

Co-Author E-mail: jimyet4luv@yahoo.com


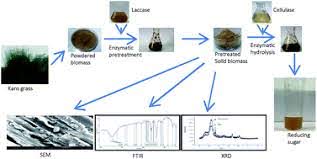


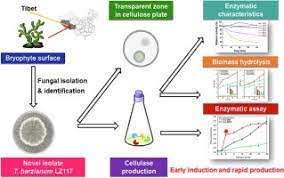


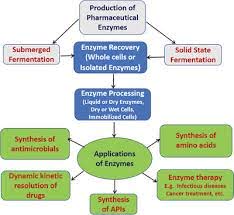


**Citrus fruit peels 🡺 yeast inside conical flask 🡺 mannanase**

Incubation period, pH, temperature, carbon and nitrogen source were optimized


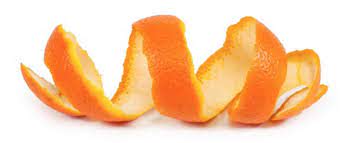

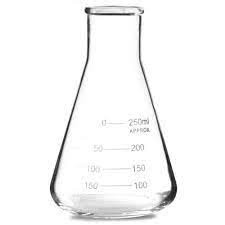


yeast

***mannanase***

**Incubation period, pH, temperature, carbon, nitrogen source**

Therefore, it can be concluded that *Pichia kudriavzevii* (AUMC 10190) isolated from citrus waste is potential yeast for the production of mannanase under suitable condition for higher yield.

**Keywords:** Gum Arabic, Mannanase, *Pichia kudriavzevii* (AUMC 101190), Yeasts
